# Supplementary material for: Dairy Fat Consumption and the Risk of Metabolic Syndrome: An Examination of the Saturated Fatty Acids in Dairy
Source: Nutrients. 2019 Sep 12;11(9):2200. doi: 10.3390/nu11092200 (PMC6769731; doi:10.3390/nu11092200)
Supplement: Supplementary file 1 [file nutrients-11-02200-s001.pdf]

**Table S1.** Summary of clinical and observational evidence on the effect of the intake of dairy-derived saturated fatty acids on metabolic syndrome risk.

| Reference                     | Study objective                                                                                                                                                      | Population                                                                                                                                            | Study design | Study duration | Adjustments | Results                                                                                                                                                                                                                                                                                                                                                                                                                                                                                               |
|-------------------------------|----------------------------------------------------------------------------------------------------------------------------------------------------------------------|-------------------------------------------------------------------------------------------------------------------------------------------------------|--------------|----------------|-------------|-------------------------------------------------------------------------------------------------------------------------------------------------------------------------------------------------------------------------------------------------------------------------------------------------------------------------------------------------------------------------------------------------------------------------------------------------------------------------------------------------------|
| Randomized, controlled trials |                                                                                                                                                                      |                                                                                                                                                       |              |                |             |                                                                                                                                                                                                                                                                                                                                                                                                                                                                                                       |
| Amer et al. (2017) [50]       | Investigate the influence of milk lipids with high or low content of medium-chain fatty acids and milk protein consumption on the blood and urine metabolic profiles | Danish adults, abdominally overweight ( $n = 52$ ; $\geq 18$ year old)                                                                                | Parallel     | 12 weeks       | -           | High vs. low medium-chain SFA butter diet: <ul style="list-style-type: none"> <li>• <math>\uparrow</math> urinary levels of adipic acid</li> </ul>                                                                                                                                                                                                                                                                                                                                                    |
| Bjermo et al. (2012) [39]     | Investigate the effects of SFA or PUFA-rich diet on liver fat, systemic inflammation, and metabolic disorders                                                        | Swedish adults, abdominally overweight ( $n = 61$ ; 30-65 year old); Role of Dietary Fatty Acids in Fatty Liver and Insulin Resistance (HEPFAT) trial | Parallel     | 10 weeks       | -           | SFA vs. PUFA diet: <ul style="list-style-type: none"> <li>• No difference in glucose measurements</li> <li>• No difference in body weight, BMI, waist circumference, percent body fat or adipose tissue gene expression <ul style="list-style-type: none"> <li>• <math>\uparrow</math> visceral/subcutaneous adipose tissue ratio</li> </ul> </li> <li>• No difference in plasma triacylglycerols, HDL cholesterol, or LDL cholesterol</li> <li>• <math>\uparrow</math> plasma cholesterol</li> </ul> |
| Bohl et al. (2015) [36]       | Investigate whether dairy-derived protein and medium-chain SFA                                                                                                       | Danish adults, abdominally overweight ( $n = 52$ ; $\geq 18$ year old)                                                                                | Parallel     | 12 weeks       | -           | High vs. low medium-chain SFA butter diet: <ul style="list-style-type: none"> <li>• No difference in glucose measurements</li> </ul>                                                                                                                                                                                                                                                                                                                                                                  |

|                            |                                                                                                                                                                                                  |                                                                        |           |          |             |                                                                                                                                                                                                                                                                                                                                                     |
|----------------------------|--------------------------------------------------------------------------------------------------------------------------------------------------------------------------------------------------|------------------------------------------------------------------------|-----------|----------|-------------|-----------------------------------------------------------------------------------------------------------------------------------------------------------------------------------------------------------------------------------------------------------------------------------------------------------------------------------------------------|
|                            | supplementation improves postprandial lipid metabolism                                                                                                                                           |                                                                        |           |          |             | <ul style="list-style-type: none"> <li>• No difference in body weight and adipose tissue gene expression</li> <li>• No difference in blood lipids</li> </ul>                                                                                                                                                                                        |
| Bohl et al. (2017) [35]    | Investigate whether intake of whey protein and butter naturally enriched in medium-chain SFA affects body composition, insulin sensitivity, blood pressure and plasma cholesterol concentrations | Danish adults, abdominally overweight ( $n = 52$ ; $\geq 18$ year old) | Parallel  | 12 weeks | -           | <ul style="list-style-type: none"> <li>• High vs. low medium-chain SFA butter diet:</li> <li>• <math>\uparrow</math> lean body mass and <math>\downarrow</math> total body and gynoid fat percentage</li> <li>• No difference in glucose homeostasis</li> <li>• No difference in blood lipids</li> <li>• No difference in blood pressure</li> </ul> |
| Iggman et al. (2011) [40]  | Investigate effect of replacing dietary dairy fat or rapeseed oil on blood lipids, glucose metabolism, and coagulation factors                                                                   | Adult Swedish subjects, hyperlipidemic ( $n = 20$ ; 25–68 year old)    | Crossover | 9 weeks  | Body weight | <p>Dairy fat vs. rapeseed oil diet:</p> <ul style="list-style-type: none"> <li>• <math>\uparrow</math> total cholesterol, LDL cholesterol, total/HDL cholesterol ratio, and triacylglycerols</li> <li>• No difference in HDL cholesterol, insulin sensitivity, fasting glucose, and glucose tolerance</li> </ul>                                    |
| Intorre et al. (2011) [48] | Investigate effect of intake of two cheese varieties differing in fat quality on blood lipids and redox status                                                                                   | Italian adults ( $n = 60$ ; 20–40 year old)                            | Crossover | 16 wk    | -           | <p>Control vs. experimental diet:</p> <ul style="list-style-type: none"> <li>• No difference in plasma total cholesterol, HDL cholesterol, LDL cholesterol and triacylglycerols</li> </ul>                                                                                                                                                          |

|                                     |                                                                                                                                                           |                                                                   |           |          |   |                                                                                                                                                                                                                                                                                                                                                                |
|-------------------------------------|-----------------------------------------------------------------------------------------------------------------------------------------------------------|-------------------------------------------------------------------|-----------|----------|---|----------------------------------------------------------------------------------------------------------------------------------------------------------------------------------------------------------------------------------------------------------------------------------------------------------------------------------------------------------------|
| Malpuech-Brugere et al. (2010) [49] | Investigate impact on CVD risk factors of milk fats with varying ratios between <i>trans</i> fatty acids, SFA, MUFA <sup>13</sup> , and PUFA              | French adults ( $n = 111$ ; 18–50 year old)                       | Parallel  | 4 weeks  | - | <p>72%, 63%, or 57% SFA milk fat diet:</p> <ul style="list-style-type: none"> <li>• No difference in HDL cholesterol.</li> <li>• ↓ total cholesterol, LDL cholesterol, and LDL/HDL cholesterol ratio in 63% SFA milk fat diet compared to 72% diet and ↓ total/HDL cholesterol ratio compared to 72% and 57% milk fat diet</li> </ul>                          |
| Matualatupauw et al. (2017) [47]    | Investigate effects of high medium-chain SFA vs. low medium-chain SFA diet on subcutaneous adipose tissue gene expression                                 | Danish adults, abdominally overweight ( $n = 52$ ; ≥ 18 year old) | Parallel  | 12 weeks | - | <p>High vs. low medium-chain SFA butter diet:</p> <ul style="list-style-type: none"> <li>• ↑ expression of gene sets related to citric acid cycle, oxidative phosphorylation, and adipogenesis</li> <li>• PPAR<math>\alpha</math> and PPAR <math>\gamma</math> coactivator 1-<math>\alpha</math> were predicted to be activated by medium-chain SFA</li> </ul> |
| Pintus et al. (2013) [46]           | Investigate effects of sheep cheese enriched in $\alpha$ -linolenic, conjugated linoleic, and vaccenic acids on plasma lipid and endocannabinoid profiles | Italian adults, hypercholesterolemic ( $n = 42$ ; 30–60 year old) | Crossover | 9 weeks  | - | <p>59% vs. 46% SFA cheese diet:</p> <ul style="list-style-type: none"> <li>• No difference when consuming 45 or 90 g/d of cheese on BMI or waist circumference</li> <li>• No difference when consuming 45 g/d of cheese on blood lipids</li> </ul>                                                                                                             |

|                                  |                                                                                                                                                                                                             |                                                                                                                                      |           |          |   |                                                                                                                                                                                                                                                                                                                               |
|----------------------------------|-------------------------------------------------------------------------------------------------------------------------------------------------------------------------------------------------------------|--------------------------------------------------------------------------------------------------------------------------------------|-----------|----------|---|-------------------------------------------------------------------------------------------------------------------------------------------------------------------------------------------------------------------------------------------------------------------------------------------------------------------------------|
|                                  |                                                                                                                                                                                                             |                                                                                                                                      |           |          |   | <ul style="list-style-type: none"> <li>• ↑ total cholesterol, HDL cholesterol, and LDL cholesterol when consuming 90 g/d</li> </ul>                                                                                                                                                                                           |
| Venkatramanan et al. (2010) [45] | Investigate whether consumption of milk enriched with 9c,11t and 10t,12c 18:2 isomers alters blood lipids; liver function; C-reactive protein; tumor necrosis factor-alpha; and body weight and composition | Canadian adults, overweight and borderline hyperlipidemic ( <i>n</i> = 15; 30–60 year old)                                           | Crossover | 32 weeks | - | 60% vs. 48% SFA milk diet: <ul style="list-style-type: none"> <li>• No difference in body weight or composition</li> <li>• No difference in triacylglycerols, total cholesterol, LDL cholesterol, or HDL cholesterol</li> </ul>                                                                                               |
| Wennergren et al. (2009) [38]    | Investigate whether increased intake of dairy products in subjects who habitually consumed a low amount of dairy beneficially affects abdominal obesity, and/or other factors of MetS                       | Finnish, Norwegian, and Swedish adult men and postmenopausal women, overweight with traits of MetS ( <i>n</i> = 121; 30–65 year old) | Parallel  | 6 months | - | Milk vs. control diet: <ul style="list-style-type: none"> <li>• No difference in glucose homeostasis measurements except ↑ insulin sensitivity</li> <li>• No difference in body weight, BMI, waist circumference, body fat mass and proportion</li> <li>• No difference in blood lipids except ↑ total cholesterol</li> </ul> |
| Werner et al. (2013) [37]        | Investigate effects of intake of butter from mountain-pasture grazing cows compared to                                                                                                                      | Danish adult and elderly ( <i>n</i> = 38; 50–70 year old)                                                                            | Parallel  | 12 weeks | - | 59% vs. 64% SFA butter diet: <ul style="list-style-type: none"> <li>• No difference in insulin, plasma glucose, or glucose tolerance</li> </ul>                                                                                                                                                                               |

|                            |                                                                                                        |                                                                                                                          |                 |   |                                                                                                                                                                                                                                                 |                                                                                                                                                                                                                                            |
|----------------------------|--------------------------------------------------------------------------------------------------------|--------------------------------------------------------------------------------------------------------------------------|-----------------|---|-------------------------------------------------------------------------------------------------------------------------------------------------------------------------------------------------------------------------------------------------|--------------------------------------------------------------------------------------------------------------------------------------------------------------------------------------------------------------------------------------------|
|                            | butter from conventionally-produced cows on risk markers of cardiovascular disease and type 2 diabetes |                                                                                                                          |                 |   |                                                                                                                                                                                                                                                 | <ul style="list-style-type: none"> <li>• No difference in body weight</li> <li>• No difference in serum total cholesterol, LDL cholesterol, HDL cholesterol, or triacylglycerols.</li> </ul>                                               |
| Observational studies      |                                                                                                        |                                                                                                                          |                 |   |                                                                                                                                                                                                                                                 |                                                                                                                                                                                                                                            |
| Drehmer et al. (2015) [33] | Investigate association between consumption of dairy products and glycemic status                      | Brazilian adults (10,010; 35–74 year old); Brazilian Longitudinal Study of Adult Health (ELSA-Brasil)                    | Cross-sectional | - | Age, sex, race, occupational status, education, family income, study center, menopause, family history of diabetes, smoking status, alcohol intake, physical activity, calorie intake, and non-dairy foods, height, waist, and hip measurements | <ul style="list-style-type: none"> <li>• Inverse association between dairy intake and fasting glucose, 2 hr post-load glucose, and hemoglobin A1c was attenuated when myristic acid was included as an adjustment to the model.</li> </ul> |
| Drehmer et al. (2016) [5]  | Investigate association of dairy, type of dairy, and dairy fat intake on MetS                          | Brazilian adults and elderly ( $n = 9,835$ ; 35–74 year old); Brazilian Longitudinal Study of Adult Health (ELSA-Brasil) | Cross-sectional | - | Age, sex, race, occupational status, education, family income, study center, menopausal status, family history of                                                                                                                               | <ul style="list-style-type: none"> <li>• Inverse association between total and full-fat dairy intake with MetScore was attenuated when dairy-derived SFA intake was included as an adjustment to the model.</li> </ul>                     |

|                                             |                                                                                                                                                                                  |                                                                                                                             |                 |   |                                                                                             | diabetes,<br>smoking status,<br>alcohol intake,<br>physical<br>activity, and<br>nondairy<br>variables                                                                                                                                                                                                                                                                                                                                                                    |
|---------------------------------------------|----------------------------------------------------------------------------------------------------------------------------------------------------------------------------------|-----------------------------------------------------------------------------------------------------------------------------|-----------------|---|---------------------------------------------------------------------------------------------|--------------------------------------------------------------------------------------------------------------------------------------------------------------------------------------------------------------------------------------------------------------------------------------------------------------------------------------------------------------------------------------------------------------------------------------------------------------------------|
| Iggman et al.<br>(2010) [31]                | Investigate<br>association<br>between individual<br>adipose tissue fatty<br>acids and insulin<br>sensitivity                                                                     | 795 Swedish men (~71 yr<br>old); Uppsala<br>Longitudinal Study of<br>Adult Men (ULSAM)                                      | Cross-sectional | - | BMI, smoking,<br>alcohol intake,<br>and physical<br>activity                                | <ul style="list-style-type: none"> <li>17:0 (% of total fatty acids) of adipose tissue biopsies was positively correlated with insulin sensitivity</li> </ul>                                                                                                                                                                                                                                                                                                            |
| Kratz et al. (2014)<br>[34]                 | Investigate<br>association of<br>intake of <i>trans</i> -16:1<br>n-7 and intake of<br>dairy fat with<br>glucose tolerance,<br>insulin sensitivity,<br>and $\beta$ -cell function | American adults with<br>NAFLD ( $n = 17$ ) with<br>age- and BMI-matched<br>controls ( $n = 15$ )                            | Cross-sectional | - | Age, sex, BMI,<br>liver-spleen ratio                                                        | <ul style="list-style-type: none"> <li>Plasma phospholipid 15:0 and 17:0 (% of total phospholipid) of was negatively associated with fasting glucose</li> <li>Phospholipid 17:0 and FFA 15:0 (% of total phospholipid and FFA, respectively) was associated with glucose tolerance</li> <li>No association of plasma phospholipid (% of total phospholipid) or FFA 15:0 and 17:0 (% of total FFA) with insulin resistance or <math>\beta</math>-cell function</li> </ul> |
| Mayneris-<br>Perxachs et al.<br>(2014) [27] | Analyze plasma<br>fatty acid<br>composition and<br>estimated<br>desaturase                                                                                                       | Spanish adults,<br>asymptomatic with high<br>risk of cardiovascular<br>disease ( $n = 427$ ; 55–80<br>year old); Prevention | Cross-sectional | - | Sex, age, energy<br>intake, BMI,<br>smoking status,<br>occupation, and<br>educational level | <ul style="list-style-type: none"> <li>Second quartile of plasma 17:0 (% of total fatty acids) was associated with <math>\downarrow</math> risk of MetS compared to</li> </ul>                                                                                                                                                                                                                                                                                           |

|                             | activities in relation to MetS status; examine associations between these patterns and MetS and its components                                                                                                 | with Mediterranean Diet (PREDIMED) study                                                                                              |                 |   |                                                                                                                                                                                                                                                        | first quartile, but not third or fourth quartiles                                                                                                                                                                                                                         |
|-----------------------------|----------------------------------------------------------------------------------------------------------------------------------------------------------------------------------------------------------------|---------------------------------------------------------------------------------------------------------------------------------------|-----------------|---|--------------------------------------------------------------------------------------------------------------------------------------------------------------------------------------------------------------------------------------------------------|---------------------------------------------------------------------------------------------------------------------------------------------------------------------------------------------------------------------------------------------------------------------------|
| Santaren et al. (2014) [30] | Investigate association of dairy fatty acid biomarkers, 15:0 acid and <i>trans</i> -16:1 n-7, with insulin resistance and $\beta$ -cell function, and with incident type 2 diabetes after 5-yr follow-up       | Hispanic, African American, and non-Hispanic white American adults, free of type 2 diabetes at baseline ( $n = 659$ ; 40–60 year old) | Cross-sectional | - | Age, sex, ethnicity, center, physical activity, smoking status, alcohol intake, education, total energy/fruit and vegetable/red meat/ soft drink/fiber intakes                                                                                         | <ul style="list-style-type: none"> <li>15:0 concentration was positively associated to log S<sub>I</sub> (insulin sensitivity index) and log DI (disposition index)</li> <li>Additional adjustment for BMI and waist circumference attenuated this association</li> </ul> |
| Wanders et al. (2017) [32]  | Investigate relationship of intake of total fatty acids, SFA, MUFA, PUFA and trans fatty acids with blood markers of diabetes risk; Investigate possible influence dietary sources of FA on these associations | Dutch adults, overweight ( $n = 5675$ ; 45–65 year old); Netherlands Epidemiology of Obesity (NEO) study                              | Cross-sectional | - | Age, sex, energy intake, alcohol intake, fiber intake, body fat percentage, smoking status, education level, physical activity, family history of diabetes, statin use, energy under-reporter, coffee intake, sugar-sweetened beverage intake; dietary | <ul style="list-style-type: none"> <li>Dairy-derived SFA intake was inversely associated with fasting insulin and HOMA-B</li> </ul>                                                                                                                                       |

---

cholesterol,  
protein intake,  
FA intake

---
